1 **Title: Evaluation of coronavirus decay in French coastal water and application to SARS-**  
2 **CoV-2 risk evaluation using Porcine Epidemic Diarrhea Virus as surrogate**

3

4 **Authors**

5 *Maud Contrant<sup>a\*</sup>, Lionel Bigault<sup>a</sup>, Mathieu Andraud<sup>b</sup>, Marion Desdouits<sup>c</sup>, Sophie Rocq<sup>c</sup>,*  
6 *Françoise S. Le Guyader<sup>c</sup>, Yannick Blanchard<sup>a</sup>*

7 <sup>a</sup> Viral Genetics and Biosecurity Unit (GVB), French Agency for Food, Environmental and  
8 Occupational Health Safety (ANSES), Ploufragan, France

9 <sup>b</sup> Epidemiology, Animal Health and Welfare Unit (EPISABE), French Agency for Food,  
10 Environmental and Occupational Health Safety (ANSES), Ploufragan, France.

11 <sup>c</sup>Ifremer, laboratoire de Microbiologie, SG2M/LSEM, BP 21105, 44311 Nantes, France

12 \*Corresponding author.

13

14 **Abstract**

15 SARS-CoV-2 in infected patient mainly display pulmonary and oronasal tropism however,  
16 the presence of the virus has also been demonstrated in stools of patients and consequently in  
17 wastewater treatment plant effluents, questioning the potential risk of environmental  
18 contamination (such as seawater contamination) through inadequately treated wastewater  
19 spill-over into surface or coastal waters. The environmental detection of RNA alone does not  
20 substantiate risk of infection, and evidence of an effective transmission is not clear where  
21 empirical observations are lacking.

22 Therefore, here, we decided to experimentally evaluate the persistence and infectious capacity  
23 of the Porcine epidemic diarrhea virus (PEDv), considered as a coronavirus representative

24 model and SARS-CoV-2 surrogate, in the coastal environment of France. Coastal seawater  
25 was collected, sterile-filtered, and inoculated with PEDv before incubation for 0–4 weeks at  
26 four temperatures representative of those measured along the French coasts throughout the  
27 year (4, 8, 15, and 24°C). The decay rate of PEDv was determined using mathematical  
28 modeling and was used to determine the half-life of the virus along the French coast in  
29 accordance with temperatures from 2000 to 2021.

30 We experimentally observed an inverse correlation between seawater temperature and the  
31 persistence of infectious viruses in seawater and confirm that the risk of transmission of  
32 infectious viruses from contaminated stool in wastewater to seawater during recreational  
33 practices is very limited. The present work represents a good model to assess the risk of  
34 transmission of not only SARS-CoV-2 but may also be used to model the risk of other  
35 coronaviruses, specifically enteric coronaviruses.

### 36 **Importance**

37 This present work is a follow up addressing the question of the persistence of coronavirus in  
38 marine environment owing to the fact that SARS-CoV-2 is regularly detected in wastewater  
39 treating plant and the coastal environment is particularly at risk since it is subjected to  
40 increasing anthropogenic pressure and is the final receiver of surface waters and treated or  
41 sometimes insufficiently depurated waste waters. Our findings are of interest to researchers  
42 and authorities seeking to monitor SARS-CoV-2 and also enteric coronaviruses in the  
43 environment, either in tourist areas or in regions of the world, where centralized systems for  
44 wastewater treatment are not implemented, and more broadly, to the scientific community  
45 involved in “One Health” approaches.

### 46 **Keywords**

47 SARS-CoV-2, seawater, half-life, PEDV, environment, surrogate

## 48 **Introduction**

49 The emergence of the human coronavirus, SARS-CoV-2, accompanied by its worldwide  
50 spread leading to the COVID pandemic (671 million cases and 6.85 million deaths on  
51 February 2023) (WHO (World Health Organization), reminds us, if needed, the health hazard  
52 posed by coronaviruses.

53 Human coronaviruses (HCoVs) are respiratory viruses that are primarily transmitted by  
54 exposure to droplets generated by coughing, sneezing or breathing, either directly in the  
55 respiratory tract or indirectly through contact with surfaces contaminated by these droplets  
56 (Marques and Domingo, 2021; Zhang et al., 2020a). Interestingly, SARS-CoV-2 RNA has  
57 been repeatedly detected in stool samples of infected patients (Xiao et al., 2020; Zhang et al.,  
58 2020b), for review (Jones et al., 2020), for long periods (Wu et al., 2020) even in the absence  
59 of gastrointestinal symptoms (Han and He, 2021; Tang et al., 2020), questioning in the early  
60 time of the pandemic the potential risk of fecal-oral or fecal-respiratory transmission  
61 (Ahmed et al., 2020a; Arslan et al., 2020; Dona et al., 2020; Gu et al., 2020; Heller et al.,  
62 2020; Hindson, 2020; Shutler et al., 2021). The SARS-CoV-2 genome was detected in raw  
63 wastewater from different metropolitan areas including Paris (Wurtzer et al., 2020), with  
64 concentrations correlating with the estimated numbers of Covid-19 cases. The genome has  
65 also been detected in treated effluents from sewage treatment plants, but to a lesser extent,  
66 suggesting that SARS-CoV-2 may contaminate the environment through accidental  
67 wastewater discharge or direct discharge (Patel et al., 2021; Polo et al., 2020; Rimoldi et al.,  
68 2020).

69 The transmission of enteric viruses through recreational use of sewage-contaminated water  
70 being possible ((Lanrewaju et al., 2022; Wyn-Jones et al., 2011), the possibility and potential  
71 consequences of environmental contamination with SARS-CoV2 or other coronaviruses was  
72 raised early on.

73 Reports on the isolation of infectious SARS-CoV-2 from the feces and urine of COVID-19  
74 patients have been documented but remain rare (reviewed in(Ahmed et al., 2021)). SARS-  
75 CoV-2 RNA was found to be significantly more persistent than infectious SARS-CoV-2,  
76 indicating that environmental detection of RNA alone does not substantiate the risk of  
77 infection and evidence of effective transmission is not clear (Bivins et al., 2020). SARS-  
78 CoV-2 transmission through wastewater and wastewater-contaminated waters is theoretically  
79 possible, but the actual risk is considered very low (Ahmed et al., 2021). Currently, an  
80 accurate risk assessment of viral exposure and transmission requires additional experimental  
81 evidence of CoV persistence in seawater.

82 Indeed, the resistance of virions to harsh conditions is highly variable and coronaviruses are  
83 considered fairly resistant in the environment, for review see (Adelodun et al., 2021;  
84 Silverman and Boehm, 2021). Indeed, SARS-CoV-2 virions, remained infectious for up to 3 h  
85 in aerosols and for 3 days on artificial surfaces respectively. SARS-CoV-2 virions are also  
86 stable over a wide range of pH values at room temperature (pH 3-10) (Anand et al., 2021;  
87 Chan et al., 2020; Chin et al., 2020; Kampf et al., 2020; Kwon et al., 2021; La Rosa et al.,  
88 2020a; La Rosa et al., 2020b; Nunez-Delgado, 2020). Previous studies on other CoVs (such as  
89 SARS-CoV, TGEV, and MHV) have shown them to be detectable in sewage for 2-4 days, in  
90 tap water for up to 10 days at 23– 25°C, and up to 100 days at 4°C, for review see (Giacobbo  
91 et al., 2021) but studies on the presence and persistence of CoVs in seawater remain scarce.  
92 One study showed that SARS-CoV-2 lost its infectivity within two days in seawater at 23°C  
93 (Lee et al., 2020), but half-lives were not calculated and this temperature is higher than those  
94 encountered in North-Western European countries like France. Another study calculated a  
95 T90 of 1.1 day in filtered seawater at 20°C for the porcine respiratory coronavirus (PRCV)  
96 (De Rijcke et al., 2021) and finally, a study showed a high impact of the temperature on the  
97 decay of SARS-CoV-2 in seawater by comparing conditions at 20°C and 4°C, with T90 of 7

98 to 10 days (Sala-Comorera et al., 2021). Intermediate temperatures were not tested. The  
99 possible long survival in water systems raises concerns about the persistence of SARS-CoV-2  
100 or other CoV in the coastal environment.

101 Coronaviruses (order: Nidovirales, suborder: Cornidovirinae, family: Coronaviridae,  
102 subfamily: Orthocoronavirinae) show very strong genetic diversity and a high prevalence in  
103 nature (Ding and Liang, 2020). This family of viruses primarily infects a wide host spectrum  
104 of mammals and birds (Su et al., 2016). Based on the variety of non-structural accessory  
105 proteins, antigenic properties and host ranges, four genera of CoV have been described  
106 (Alpha-, Beta-, Delta-, and Gamma-CoV among which Alpha- and Beta-CoV include viruses  
107 infecting humans (HCoV). The emerged pandemic SARS-CoV-2 belongs to Beta-CoV, along  
108 with SARS-CoV-1 and MERS-CoV, two previously emerging HCoVs. Alpha and  
109 Betacoronaviruses are known to infect a variety of vertebrate mammalian hosts including  
110 swine, bats, minks or rodents. Until recently, deltacoronaviruses were known to infect a  
111 variety of hosts such as birds and non-human mammals, but two cases of human infection  
112 with porcine deltacoroanaviruses were reported in 2021 (Lednicky et al., 2021).  
113 Gammacoronaviruses infect essentially birds. Although coronaviruses are divided into four  
114 distinct genera, they all share similar physicochemical properties with an enveloped spherical  
115 viral particle of 120 nm diameter and the same genomic organization with a single-stranded  
116 RNA genome of positive polarity (25 - 30kb) coding for conserved ORFs that are the  
117 replicase complex, structural proteins (envelope, membrane, spike and nucleoprotein) and a  
118 variable number of non-structural accessory proteins. SARS-CoV-2, like some other  
119 coronaviruses (SARS-CoV, MERS) is zoonotic, leading to its classification as a BSL3-like  
120 pathogen with a commitment to need for an L3 laboratory facility for its manipulation. The  
121 number of BSL3 laboratory is much more limited than that of BSL2 laboratories and non-

122 zoonotic coronaviruses have been largely and successfully used as surrogate of SARS-CoV-2  
123 for studies in BSL2 facilities.

124 For this reason, we previously used porcine epidemic diarrhea virus (PEDV) and infectious  
125 bronchitis virus (IBV), both without any zoonotic potential, as viral substitutes for SARS-  
126 CoV-2 (Bernard louis et al., 2020) and found that treatment in a climate chamber at 70°C for  
127 1 h with a 75% humidity rate was adequate for enabling substantial decontamination of both  
128 model animal coronaviruses, confirming for these two viruses the overall inactivation  
129 properties shared by coronaviruses (Guillier et al., 2020). In the current study, we relied on  
130 the CV777 strain of PEDv, a swine alphacoronavirus, as a surrogate for SARS-CoV-2.

131 To evaluate the stability and resistance of CoV and by extension of SARS-CoV-2 in the  
132 coastal environment, the genomic and infectious titers, the latter directly correlated to the  
133 infection risk of the CoV model and the SARS-CoV-2 surrogate, PEDv, were measured in  
134 natural coastal seawater for 28 days, and the results were used to build a mathematical model  
135 of coronavirus decay in seawater at a range of temperatures (8°C, 15°C, and 24°C)  
136 representative of the annual variation of the French coastal waters. A fourth temperature of  
137 4°C was also investigated as a reference temperature, allowing for comparisons with other  
138 studies addressing decay in different types of water. The decay rate of PEDv was then used to  
139 determine the half-life of the virus in French coastal waters, using the temperatures reported  
140 for each trimester (year quarters) from 2000 to 2021.

## 141 **Materials and methods**

142

### 143 *Cells and Virus*

144 Vero cells (ATCC® CCL-81) are maintained in EMEM (ThermoFisher Scientific, France)  
145 supplemented with 10% fetal calf serum (reference 702774, Corning) and 1% Penicillin /  
146 Streptomycin (reference 11548876, GIBCO).

147 CV777 viral strain (genbank: AF353511) of porcine epidemic diarrhea virus (PEDV) was  
148 used as a surrogate of the SARS-CoV-2. Briefly, the virus is amplified on Vero cells, in an  
149 infection medium, composed of EMEM supplemented with 0.3% tryptone phosphate broth,  
150 0.02% yeast extract, 1% Penicillin / Streptomycin and 10 µg / ml trypsin. (reference 215240,  
151 DIFCO). After 16 hours of infection, the cells are lysed by three successive freezing (-80 ° C),  
152 thawing (37 ° C). The culture medium is clarified by rapid centrifugation at 10000g for 10  
153 minutes then the virus is pelletized for 4 hours at 20000g, and taken up in 1/100 of PBS of the  
154 initial volume of the CV777 inoculum. Viral titer was determined by Immuno Peroxidase  
155 Monolayer Assay (Detection limit: 0.5TCID<sub>50</sub>/ml), and genomic titer by one-step RT-qPCR  
156 (Detection limit: 50 copies/5µl of extract) (Bigault et al., 2020). The viral stock was titrated at  
157 1.7\*10<sup>8</sup> TCID<sub>50</sub> / ml.

#### 158 ***Determination of the TCID<sub>50</sub> by Immuno Peroxidase Monolayer Assay (IPMA)***

159 In a 96-well plate, 8.10<sup>4</sup> Vero cells are seeded per well and allowed to adhere for at least 6  
160 hours. The cells are washed 3 times with PBS (sigma, France), then infected with 100 µl of  
161 virus diluted in the infection medium. The infection is stopped after 16 hours and the cells  
162 fixed with 50 µl of 80% acetone for 20 minutes at -20 ° C. After drying for 30 minutes at  
163 room temperature (RT), the endogenous peroxidases are neutralized with 50 µl of a solution  
164 of 99% methanol / 1% H<sub>2</sub>O<sub>2</sub> for 30 minutes at RT. Wells are washed twice with 200 µl of  
165 PBS tween (PBST, sigma # P3563), then blocked for 90 minutes at 37 ° C with a solution of  
166 PBST + 5% milk (PBST5, Dutscher # 2516188). The presence of viral proteins is detected by  
167 incubation with 100µl of an anti PEDV pig serum diluted to 1/300th in PBST5, 1h at 37 ° C,  
168 followed by 3 washes of 200µl PBST, then a 1h incubation at 37 ° C in the presence of 100µL

169 of Goat anti pig IgG- coupled to horseradish peroxidase (HRP) (Sigma, France, #AP166P)  
170 diluted to 1/300 in PBST5. After three washes in PBST, the visualization is made by adding  
171 50  $\mu$ l of AEC/H<sub>2</sub>O<sub>2</sub> (Reference AEC: sigma #A6926) as developer for 10 minutes RT. The  
172 reaction was stopped by removing the developer followed by a last wash with PBS. The viral  
173 titer was determined by the Kärber method (Kärber 1931). For analysis, log of TCID<sub>50</sub> for  
174 each point were normalized as the ratio against the initial log of TCID<sub>50</sub>. TCID<sub>50</sub> sensibility  
175 is as low as 0.5 \* 10<sup>e1</sup> TCID<sub>50</sub>, which is therefore the low limit of detection.

### 176 *Viral decay trial*

177 The impact of seawater temperature on the stability and survival of PEDv, chosen as a  
178 substitute model for SARS-CoV-2, is evaluated in natural coastal seawater collected and  
179 sand-filtered on the October 21<sup>st</sup>, 2020 at an experimental oyster farm on the French Atlantic  
180 coast (PMMB, Ifremer, Bouin, France) where it is used for growing oysters. At sampling, pH  
181 was 8.71, salinity 33.9 and turbidity 2.7 NTU. The seawater is then aliquoted and kept frozen  
182 at -80°C for 3 to 8 months before being used. The filtered coastal seawater was spiked with  
183 the CV777 virus stock to achieve a load of 1.10<sup>6</sup> TCID<sub>50</sub> / ml and 1.10<sup>8</sup> genome copy / ml.  
184 To prevent any temperature variations due to sample manipulation, as well as the risk of  
185 contamination, 1 ml aliquots of this spiked water were incubated in water baths at 4 ° C, 8 °  
186 C, 15 ° C and 24 ° C, in the dark, throughout the experiments. A preliminary experiment  
187 lasted 16 days with aliquots sampled randomly on day 0 to day 3, day 7 to day 10 and day 14  
188 to day 16. Then, based on these first results three series of experiments were conducted during  
189 28 days with aliquots randomly sampled on day 4 to day 7, day 11 to day 14, day 18 to day 21  
190 and day 25 to day 28. For each time/temperature pair studied, aliquots were analyzed by  
191 PEDV-specific RT-qPCR, to quantify the viral genome, and by TCID<sub>50</sub>, to determine the  
192 infectious capacity of the virus. In addition, the rest of spiked seawater at day 0 was stored at -  
193 80 °C for later genomic load determination (Bigault 2020) and TCID<sub>50</sub>.



194 ***Viral decay modeling***

195 The objective here is to define a mathematical model representing the decrease in PEDv viral  
196 titers over time as a function of temperature. Two models were selected among those recently  
197 used for this type of analysis, a bi-exponential model and a Weibull type model (de Oliveira et  
198 al., 2021). Data were normalized for TCID<sub>50</sub>, each point (<sub>n</sub>TCID<sub>50</sub>) treated as the ratio  
199 between the value obtained at point t<sub>n</sub> and the initial value at point t<sub>0</sub>.

200 - The bi-exponential model.

201 This model is expressed as a function of 4 parameters: two threshold values a<sub>1</sub> and a<sub>2</sub> and  
202 two decay rates δ<sub>1</sub> and δ<sub>2</sub>:

$$V(t) = a_1 \exp(-\delta_1 t) + a_2 \exp(-\delta_2 t).$$

203 Thus, the initial titer is expressed by V(0)=a<sub>1</sub>+a<sub>2</sub>, to which two successive exponential  
204 decreasing phases.

205 - The Weibull model

206 This model is also based on 4 parameters

$$V(t) = 1 - D * \exp(-(\delta t)^{-\alpha}).$$

207 In this model, an asymptotic decrease is represented towards a threshold value  $V_{\infty} = 1 - D$ .

208 The parameter δ governs the initial phase of decay when the parameter α influences the  
209 behavior over longer durations and the speed of convergence towards the value  $V_{\infty}$ .

210 - Parameter estimation

211 The data used to estimate the parameters are shown in Figure 1 and Table 1. Each panel  
212 corresponds to a water temperature (4, 8, 15 and 24°C); for each of them, six kinetics were  
213 considered (tree separate experiments analyzed on duplicate). The estimation of the

214 parameters was carried out using a non-linear mixed-effect model for which the kinetics of  
215 the repetitions are considered as a longitudinal follow-up in a population. Briefly, for each  
216 model, the parameters  $\theta$  are estimated at the population level. The individual parameters were  
217 assumed to be log-normally distributed, thus ensuring their positivity. The parameters of  
218 individual  $i$  are given by

$$219 \log(\hat{\theta}^i) = \log(\hat{\theta}^{\text{pop}}) + \beta_{\text{Temp}} * \text{Temp} + \eta_{\text{Temp}}(\hat{\theta}^i),$$

220 where  $\hat{\theta}_{\text{pop}}$  represents the median parameter independent of temperature at the population  
221 level.  $\hat{\theta}^{\text{pop}}$  represents the value of the mean parameter in the population.  $\eta_{\text{Temp}}(\hat{\theta}^i)$  are random  
222 effects vectors assumed to be independent centered Gaussian vectors with variance  $\omega_{\text{Temp}}^2$ ,  
223 representing interindividual variability. The temperature is integrated as a covariate for all the  
224 parameters and has an impact when the associated parameter  $\beta_{\text{Temp}}$  is significantly different  
225 from 0. The quality of adjustment of the models is evaluated according to the Akaike criterion  
226 (AIC), the model having the lowest AIC being selected.

227 - Seawater temperature along the French Coast

228 The temperature of the water is regularly monitored on different site of the seashore in  
229 France. In this study, data collected in continental French territory were considered. 308  
230 sampling points were included for which temperature was recorded between 2000 and 2021 at  
231 different depth (REPHY dataset - French Observation and Monitoring program for  
232 Phytoplankton and Hydrology in coastal waters. Metropolitan data -  
233 <https://doi.org/10.17882/47248>). Here, we focused on surface waters only, with a depth  
234 varying between 0 and 1m. The dataset consisted in 54000 temperature records, which where  
235 analyzed quarterly from January to December to derive the average quarter temperature for  
236 each year. Feeding the decay model with these temperature records allowed for evaluating the  
237 virus half-life for each sampling location and each quarter.

238

## 239 **Results**

### 240 *Survey of PEDv decay in seawater*

241 The half-life of the coronavirus virion in seawater was poorly characterized when starting  
242 these experiments. Therefore, in a preliminary experiment (data not show), we measured the  
243 decay of virions at four different temperatures (4, 8, 15, and 24°C) for 16 days. At the two  
244 lowest temperatures, we observed only a slight decrease in infection of 5% and 12% at 4°C  
245 and 8°C, respectively, by day 16. At day 16, for the 15°C temperature the infectious titer  
246 dropped by about 40% (from 6 Log<sub>10</sub> TCID<sub>50</sub> to 3,6 log<sub>10</sub> TCID<sub>50</sub>) and complete loss of  
247 infection was observed after 7 days at 24°C (0.8 log<sub>10</sub> TCID<sub>50</sub>). In parallel with infectivity,  
248 a measure of genomic load was performed using RT-qPCR, which revealed the stability of the  
249 viral genome throughout the 16 days duration of this preliminary experiment. Therefore, in  
250 order to be able to decipher more precisely the viral decay of PEDv in seawater, three  
251 independent series of experiments were performed with the same temperature settings (4, 8,  
252 15 and 24°C) but extended to 28 days.

253 TABLE 1 gives the mean TCID<sub>50</sub> results of the 3 series of experiments and Figure 1 shows  
254 the daily evolution of TCID<sub>50</sub>, normalized to the initial (D0) TCID<sub>50</sub>, for 28 days at the four  
255 different temperatures.

256 We observed good repeatability for the samples collected at different time points in the  
257 experiment, with the same trend for each of the triplicates according to the temperature.  
258 However, significant variability between the triplicates on days 20 to 28 at a temperature of  
259 15 °C was also observed (day 25: 0.5 Log<sub>10</sub> TCID<sub>50</sub> for series 1 and 2 and 2.9 Log<sub>10</sub>  
260 TCID<sub>50</sub> for series 3), which gives a random and blurred aspect to this region of the curve.  
261 The complete experiment, over four weeks, confirmed the trend observed during the first test.

262 At 4°C and 8°C, we observed an overall good stability of the PEDv infectious titer with 82%  
263 and 69% of the initial TCID50 value maintained after 28 days of incubation in our coastal  
264 water sample, respectively. At 15°C, 88% of the TCID 50 was maintained during the first 7  
265 days, and then the infectious titer dropped to 67% of the initial TCID50 during the next seven  
266 days followed by a regular decline of the TCID50 value to 23% of the initial TCID50 by day  
267 28. In the last part of the experiment, the individual TCID50 values at 15°C were much more  
268 dispersed, as reflected by the increase in the standard deviation values for the last points from  
269 Day 18 onward. Finally, the complete loss of infectious PEDV after 7 days at 24°C was  
270 confirmed. In parallel with the measurement of the infectious titer, the viral genome  
271 concentration was measured by RT-qPCR to ascertain the presence of viral particles in the  
272 incubation medium used for the infection (Supplemental 1 and Figure 1). Despite day-to-day  
273 variations, on the 28 days duration of the experiment, the PEDv genome loads remained  
274 stable for the four experimental conditions, confirming that the decrease in infectious titer was  
275 not due to the loss of virus when preparing the viral inoculum for TCID50 experiments, but to  
276 the time- and temperature-dependent degradation of the viral particles.

### 277 *Modelling the infectious load decay of coronavirus in coastal water*

278 Two models, a bi-exponential model and a Weibull type model (Camillo de Oliveira 2021)  
279 were evaluated to define a mathematical model of the decrease in PEDv viral titers in coastal  
280 water over time as a function of temperature. Akaike's information criterion was lower with  
281 the Weibull model than with the bi-exponential model (-728 and -634, respectively),  
282 indicating a better fit of the data with the Weibull model. The model parameters, representing  
283 the average kinetics estimated at the population level are listed in Table 2.

284 The log-linear regression model revealed a significant effect of temperature on all the  
285 individual parameters, accounting for inter-individual variability. Correlation between the

286 parameters estimated for each kinetic and the water temperature is shown in Figure 2. The  
287 parameters governing the decrease ( $\delta$  and  $\alpha$ ) reflect the persistence observed at 4°C over the  
288 duration of the experiment. These parameters showed a strong dependence on the water  
289 temperature. A strong exponential increase in  $\delta$  was observed between 15 °C and 24°C,  
290 indicating an impact on the initial decrease. The increase in parameter  $\alpha$ , which governs the  
291 speed of convergence towards  $V_{\infty}$  (asymptotic viral load), also showed an exponential trend,  
292 varying from 1 to 3 between 4 and 24°C.

### 293 *Analysis of the persistency of coronaviruses along the French seashore*

294 We applied the coronavirus decay model along the French seashore, considering the  
295 variations in temperature occurring within a year.

296 The quarterly average temperature varied seasonally, ranging from 6 °C to 14°C in winter and  
297 from 14 to 26°C in summer. The map displayed in figure 3 highlights geographical  
298 discrepancies between northern and southern France as well as between the Mediterranean  
299 coast and the Atlantic Ocean in the west.

300 The half-life of the virus in the surface water at each sampling point was evaluated based on  
301 the quarterly average temperature and is represented as a heat map in figure 4. Reflecting the  
302 analysis of the temperature records, a huge seasonal effect was observed, with a half-life of  
303 coronavirus infectivity of up to 70-80 days during the coldest period, falling below 20 days at  
304 all locations during the summer. The northern area exhibited the highest half-life seasonal  
305 variation compared to that of Corsica where water temperatures remained much stable  
306 throughout the year.

307

308

309

310 **Discussion**

311 Viral contamination of water or food by human sewage is a long-documented origin of  
312 gastroenteritis outbreaks, as exemplified by the contamination of oysters by human norovirus  
313 (HuNoV) (Le Guyader et al., 2009; McLeod et al., 2017). At the beginning of the pandemic,  
314 the question regarding SARS-CoV-2 risk of exposure and transmission to human during  
315 recreational activities was highlighted. Although significant amounts of SARS-CoV-2 RNA  
316 are regularly detected in the feces of patients, it has been shown that the infectious capacity of  
317 the SARS-CoV-2 virus from feces is very limited. A few studies have concluded that the risk  
318 of infection following exposure to SARS-CoV-2 in water is low (Ahmed et al., 2021; Bivins  
319 et al., 2020; Silverman and Boehm, 2021). However, the evaluation of CoV survival in water  
320 and especially in seawater will be informative for SARS-CoV-2 but also for other CoV,  
321 especially enteric CoV.

322 This study aimed to monitor experimentally and concretely the survival/persistence of PEDV,  
323 as a representative of CoV and as a surrogate for SARS-CoV-2, in marine waters. This using  
324 the modeling of its decay over time and water temperature data taken in France. The potential  
325 risk of infection in French coastal waters, in case of contamination by the discharge of  
326 wastewater was also evaluated and confirmed to be low or inexistent. As mentioned above,  
327 SARS-CoV-2 manipulation requires a level 3 laboratory, which is available in a limited  
328 number of facilities and represents more tedious working conditions than level two  
329 laboratories. To circumvent this constraint, several surrogate agents of SARS-CoV-2 have  
330 been used for decay and environmental persistence experiments. Non-enveloped viruses, such

331 as bacteriophage MS2, pose problems of misinterpretation and accuracy; non enveloped  
332 viruses are known to be more resistant than enveloped viruses (La Rosa et al., 2020a; La Rosa  
333 et al., 2020b). The use of a coronavirus as a surrogate provides greater reliability as  
334 coronaviruses form an organizational unit with similar biophysical properties and genomic  
335 structures. Moreover, (Guillier et al., 2020) have shown a similar temperature and relative  
336 humidity persistence potential of different coronaviruses infecting human and non-human  
337 mammals, on surfaces and in suspension, confirming the potential of animal coronaviruses as  
338 surrogates. To study the persistence of coronavirus in seawater, we selected PEDv, a porcine  
339 enteric alphacoronavirus we handled in a BSL2-type confined laboratory . Recently, the  
340 PEDv has been used several times, as surrogate for HCoV, including SARS-CoV-2, i) to  
341 compare analytical methods to detect SARS-CoV-2 in wastewater (Perez-Cataluna et al.,  
342 2021), ii) as a process control for the monitoring of the occurrence of SARS-CoV-2 in 2020 in  
343 six wastewater treatments plants in Spain (Randazzo et al., 2020), iii) to evaluate the use of  
344 viability RT-qPCR for the selective discrimination and surveillance of infectious SARS-CoV-  
345 2 in secondary-treated wastewater (Monteiro et al., 2022), iv) to test the temperature  
346 sensitivity of different CoV in fomites (Cuevas-Ferrando et al., 2022), v) to evaluate the  
347 effects of dry- and moist-air controlled heating treatment on structure and chemical integrity,  
348 decontamination yield, and filtration performance of surgical masks and FFP2 respirators  
349 (Bernard et al., 2020), vi) and to test inactivation of PEDv on contaminated surgery masks by  
350 low-concentrated sodium hypochlorite dispersion (Antas et al., 2020). Furthermore, in a  
351 previous study, we demonstrated and quantified the bioaccumulation of PEDv or inactivated  
352 SARS-CoV-2 in oysters, and observed a similar tissue distribution and efficacy of  
353 bioaccumulation between the two coronaviruses, suggesting that PEDv is an adequate  
354 surrogate for SARS-CoV-2 in marine environments (Desdouits et al., 2021).

355 Various studies using surrogate viruses (Sala-Comorera et al., 2021) and addressing the  
356 detection and survival of coronaviruses in wastewater, river water, or filtered or sterilized  
357 water have been conducted over the past 2 years (Ahmed et al., 2020b; Guillier et al., 2020;  
358 Randazzo et al., 2020). Others used both surrogates and the SARS-CoV-2 (de Oliveira et al.,  
359 2021; Sala-Comorera et al., 2021) but were conducted either at low temperatures (4°C) or at  
360 higher temperatures (20–25°C). Yet, the temperature gradient was not considered in the same  
361 model. The synthesis that can be drawn from these studies shows a common trend, in which  
362 different viruses remain infectious for several hours to several weeks, depending on the  
363 experiment, in different types of water (pure water, surface water, seawater and sterilized  
364 wastewater), with infectivity maintained for a longer period of time at the lowest temperatures  
365 (Chin et al., 2020; Lee et al., 2020; Ye et al., 2016). Recently, (Sun et al., 2022) showed an  
366 inverse correlation between temperature and viral titer for the viability of SARS-CoV-2 in  
367 media and artificial seawater. These studies illustrate that intact coronavirus particles present  
368 in coastal waters may remain infectious for some time.

369 Our results present a follow-up of the decay of the virus over a long period with a wide  
370 temperature gradient (from 4°C to 24°C), similar to the temperature gradient observed in  
371 French coastal waters throughout the year, associated with a mathematical model used for  
372 evaluating the virus half-life along the French shore throughout the year. This experiment  
373 clearly shows that seawater temperature has a dramatic effect on the duration of the infectious  
374 capacity of PEDv and, by homology, on coronaviruses including SARS-CoV-2. The parallel  
375 evaluation of the genomic load of the samples throughout the experiment precludes the  
376 possible bias of a reduction in the viral load due to artifacts such as adsorption on the tube  
377 walls or other phenomena. Under summer conditions representative of Mediterranean  
378 conditions (24°C), we observed a rapid loss of the infectious capacity of the virus in seawater,  
379 with a loss of almost two log TCID<sub>50</sub> at 3-4 days and a total loss at day 7. Under conditions



380 mimicking the spring Atlantic coast (~15°C), the effect was more gradual, with a loss of one  
381 log in one week and almost total loss at 3 weeks. In winter conditions (4°C and 8°C), the  
382 infectious virus is more stable, with survival extending beyond four weeks

383 In another study assessing SARS-CoV-2 survival in cell culture medium, with a similar range  
384 of temperatures as ours (4°C, 13°C, 21°C and 25°C), the best virus survival was also  
385 observed with the coolest conditions; the virus was relatively stable for all the temperature  
386 conditions with the maximum log reduction of 1.17 virus titer at 4 days post-contamination at  
387 25°C (5.104 TCID<sub>50</sub> starting dose) (Kwon et al., 2021). Coronaviruses are sensitive to  
388 extremely acidic and basic pH. Therefore, the faster inactivation of PEDv in seawater can be  
389 explained by the high salinity concentration in combination with alkaline conditions (pH>8)  
390 in seawater compared to that in culture medium (Kwon et al., 2021), wastewater and pure  
391 water (Chan et al., 2020).

392 Using the experimental kinetics of the viral decay of PEDv as a function of real temperature  
393 data along the French coast during the year (considering the mean temperatures reported from  
394 2000 to 2021) allowed us to evaluate the half-life of the virus according to seasons. The risk  
395 of viral transmission is correlated with a longer half-life of the virus and a higher  
396 frequentation of human populations in coastal environments. Fortunately, these two  
397 parameters are inversely correlated with a peak of human population in coastal areas during  
398 summer, when the half-life of the virus is the shortest, owing to the higher water temperature  
399 which is deleterious to the virus. Conversely, the better survival conditions for the virus in  
400 winter is balanced by a lower population size and frequentation in the recreational usage of  
401 coastal areas. The situation is somewhat different concerning workers, such as for oyster  
402 farmers or fisherman, in contact with water all the year around even at the coldest  
403 temperature when virus half-life is the longest. In our previous study, we showed a low  
404 bioaccumulation efficiency of SARS-CoV-2 in oysters, as well as the absence of detection of

405 this virus in seawater and shellfish samples collected on the French coast from April to  
406 August 2020 (Desdouits et al., 2021), confirming that the actual risk of contamination in food  
407 such as shellfish by the SARS-CoV-2 is low. Furthermore, if we consider the effect of tides,  
408 bringing an additional physical dispersion and dilution effect on the virus, all of these  
409 parameters favor a low risk of coronavirus contamination during seashore activities.

410 It is important to mention that these results could be refined by considering additional  
411 parameters of seawater as the variation in salinity (this study used only one salinity  
412 representative of the Brittany coast) and by estimating the effect of solar radiation, a known  
413 driver of viral decay, with summer exhibiting higher UV radiation exposure than winter.

414 Given the low survival of SARS-CoV-2 in sewage (Silverman and Boehm, 2021), the main  
415 risk of SARS-CoV-2 contamination through coastal water exposure likely lies in the direct  
416 release of raw sewage, places without connection to wastewater collection systems, ports, and  
417 in the event of a sanitation accident or human feces in seawater. The question also arises of  
418 soils contamination during spreading by slurry potentially contaminated by coronaviruses  
419 from livestock (ex: PEDv) and therefore by runoff and water contamination. This work could  
420 thus be used for the identification of areas that are the most at risk for humans in the case of  
421 spillover before treatment, as well as for the identification of maritime areas at risk of reverse  
422 zoonotic transmission to the marine animal population and, therefore, to be monitored as a  
423 priority. Indeed, cases of SARS-CoV-2 contamination have been reported essentially in  
424 various terrestrial animal species (Andersen et al., 2020; Hale et al., 2021; Prince et al., 2021;  
425 Sharun et al., 2021) it might also infect marine mammals (Audino et al., 2021). Alpha, and  
426 gammacoronavirus infections are already known to cause respiratory diseases in aquatic  
427 mammals and recent studies have shown that several species of marine mammals possessed  
428 the SARS-CoV-2 receptor, ACE2 (Luan et al., 2020; Nabi and Khan, 2020), with amino acids

429 sequences highly conserved between human and marine mammal species. The binding of  
430 SARS-CoV-2 to ACE2 is an essential step in the infection of SARS-CoV-2, which can  
431 therefore make these animals susceptible to SARS-CoV-2 infection (Mathavarajah et al.,  
432 2021; Mordecai and Hewson, 2020). Thus, contamination of seawater from sewage,  
433 wastewater effluent, or urban and agricultural runoff, and the survival of SARS-CoV-2 are  
434 potentially a risk for marine mammals. Guo et al. modeled this risk by analyzing the possible  
435 dispersion of the virus following contamination in seawater and confirmed that this risk of  
436 infection is directly linked to viral concentrations, but also suggested a critical role of the  
437 temperature of the water (Guo et al., 2021).

#### 438 **Funding**

439 This work is supported by the Agence Nationale de la Recherche and the Fondation de France  
440 (ANR RA-Covid wave 5, n°00109676), the Région Pays de la Loire (order n°2020-12887), by  
441 an internal funding from Ifremer General Direction (SARS-CoV-2 action plan) and the  
442 European project VEO (H2020, SC1-2019-874735).

443

#### 444 **Figure legends**

445 **Figure 1: Genomic and infectious titers of PEDv incubated in seawater at four different**  
446 **temperatures for 28 days.** 1 ml aliquots of seawater were spiked with the PEDv CV777  
447 virus stock to achieve a load of  $1.10^6$  TCID50 / ml and  $1.10^8$  genome copy / ml then incubated  
448 in water baths for 28 days at 4 different temperatures : 4°C, upper left panel ; 8°C, upper right  
449 panel ; 15°C, lower left panel and 24°C, lower right panel. The genomic load (genome copies,  
450 in log scale, right axis, upper part of each panel) and infectious titer (ratio of the TCID50

451 measured at each time point (days of incubation, horizontal axis) on the one at day 0 for each  
452 experiment, left axis, bottom part of each panel) were measured 4 days a week (D4 to D7,  
453 D11 to D14, D18 to D21 and D25 to D28), by RT-qPCR and IPMA respectively, in duplicate  
454 for each aliquot on the same aliquot, and during three independent experiments. For each  
455 condition, the 6 measures are depicted with blue to yellow points and lines. The Weibull  
456 models calculated for the infectious titer decay are represented by the red curves.

457 **Figure 2: Correlation between the parameters estimated for each kinetic and the water**  
458 **temperature.**

459 **Figure 3: Mean quarterly temperatures of surface waters on the French coast from**  
460 **2000 to 2021.**

461 **Figure 4: Estimated half life (in days) of coronavirus in surface water, based on**  
462 **quarterly average temperature for each collection location.**

463

464 **Table legends**

465 **Table 1: log<sub>10</sub> TCID<sub>50</sub> and % from TCID<sub>50</sub> at D0 of PEDv for viral titer quantification**  
466 **results during incubation in seawater at 4°C, 8°C, 18°C and 24°C, per days, during 28**  
467 **days.** 1 ml aliquots of water was spiked with the CV777 virus stock to achieve a load of  
468 1.10e6 TCID<sub>50</sub> / ml (6 log<sub>10</sub> TCID<sub>50</sub>) then incubated in water baths at the 4 different  
469 temperatures, for 28 days. Infectious titer were determined at day 0, 4 to 7, day 11 to 14 day  
470 18 to 21 and day 25 to 28 by IPMA. **DPI: day post infection; SD: standard deviation;**  
471 **Temp: temperature.**

472 **Table 2: parameters estimated at the population level representing the average kinetics**  
473 **for the bi-exponential and the Weibull model. (\* p-value<0.05). AIC : Akaike's**  
474 **information criterion.**

475

## 476 **Bibliography**

477 Adelodun, B., Ajibade, F.O., Tiamiyu, A.O., Nwogwu, N.A., Ibrahim, R.G., Kumar, P.,  
478 Kumar, V., Odey, G., Yadav, K.K., Khan, A.H., Cabral-Pinto, M.M.S., Kareem, K.Y.,  
479 Bakare, H.O., Ajibade, T.F., Naveed, Q.N., Islam, S., Fadare, O.O., Choi, K.S., 2021.  
480 Monitoring the presence and persistence of SARS-CoV-2 in water-food-environmental  
481 compartments: State of the knowledge and research needs. *Environ Res* 200, 111373.  
482 Ahmed, W., Angel, N., Edson, J., Bibby, K., Bivins, A., O'Brien, J.W., Choi, P.M., Kitajima,  
483 M., Simpson, S.L., Li, J., Tschärke, B., Verhagen, R., Smith, W.J.M., Zaugg, J., Dierens, L.,  
484 Hugenholtz, P., Thomas, K.V., Mueller, J.F., 2020a. First confirmed detection of SARS-CoV-  
485 2 in untreated wastewater in Australia: A proof of concept for the wastewater surveillance of  
486 COVID-19 in the community. *Sci Total Environ* 728, 138764.  
487 Ahmed, W., Bertsch, P.M., Bibby, K., Haramoto, E., Hewitt, J., Huygens, F., Gyawali, P.,  
488 Korajkic, A., Riddell, S., Sherchan, S.P., Simpson, S.L., Sirikanchana, K., Symonds, E.M.,  
489 Verhagen, R., Vasani, S.S., Kitajima, M., Bivins, A., 2020b. Decay of SARS-CoV-2 and  
490 surrogate murine hepatitis virus RNA in untreated wastewater to inform application in  
491 wastewater-based epidemiology. *Environ Res* 191, 110092.  
492 Ahmed, W., Bibby, K., D'Aoust, P.M., Delatolla, R., Gerba, C.P., Haas, C.N., Hamilton,  
493 K.A., Hewitt, J., Julian, T.R., Kaya, D., Monis, P., Moulin, L., Naughton, C., Noble, R.T.,  
494 Shrestha, A., Tiwari, A., Simpson, S.L., Wurtzer, S., Bivins, A., 2021. Differentiating  
495 between the possibility and probability of SARS-CoV-2 transmission associated with  
496 wastewater: empirical evidence is needed to substantiate risk. *FEMS Microbes* 2.  
497 Anand, U., Bianco, F., Suresh, S., Tripathi, V., Nunez-Delgado, A., Race, M., 2021. SARS-  
498 CoV-2 and other viruses in soil: An environmental outlook. *Environ Res* 198, 111297.  
499 Andersen, K.G., Rambaut, A., Lipkin, W.I., Holmes, E.C., Garry, R.F., 2020. The proximal  
500 origin of SARS-CoV-2. *Nat Med* 26, 450-452.  
501 Antas, M., Szczołka-Bochniarz, A., Wozniakowski, G., 2020. Effective inactivation of  
502 porcine epidemic diarrhea virus on contaminated surgery masks by low-concentrated sodium  
503 hypochlorite dispersion. *Pol J Vet Sci* 23, 647-650.  
504 Arslan, M., Xu, B., Gamal El-Din, M., 2020. Transmission of SARS-CoV-2 via fecal-oral and  
505 aerosols-borne routes: Environmental dynamics and implications for wastewater management  
506 in underprivileged societies. *Sci Total Environ* 743, 140709.  
507 Audino, T., Grattarola, C., Centelleghè, C., Peletto, S., Giorda, F., Florio, C.L., Caramelli, M.,  
508 Bozzetta, E., Mazzariol, S., Di Guardo, G., Lauriano, G., Casalone, C., 2021. SARS-CoV-2, a  
509 Threat to Marine Mammals? A Study from Italian Seawaters. *Animals (Basel)* 11.  
510 Bernard, L., Desoubreux, G., Bodier-Montagutelli, E., Pardessus, J., Brea, D., Allimonnier,  
511 L., Eymieux, S., Raynal, P.I., Vasseur, V., Vecellio, L., Mathe, L., Guillon, A., Lanotte, P.,  
512 Pourchez, J., Verhoeven, P.O., Esnouf, S., Ferry, M., Eterradossi, N., Blanchard, Y., Brown,  
513 P., Roingard, P., Alcaraz, J.P., Cinquin, P., Si-Tahar, M., Heuze-Vourc'h, N., 2020.  
514 Controlled Heat and Humidity-Based Treatment for the Reuse of Personal Protective  
515 Equipment: A Pragmatic Proof-of-Concept to Address the Mass Shortage of Surgical Masks  
516 and N95/FFP2 Respirators and to Prevent the SARS-CoV2 Transmission. *Front Med*  
517 (Lausanne) 7, 584036.

518 Bigault, L., Brown, P., Bernard, C., Blanchard, Y., Grasland, B., 2020. Porcine epidemic  
519 diarrhea virus: Viral RNA detection and quantification using a validated one-step real time  
520 RT-PCR. *J Virol Methods* 283, 113906.

521 Bivins, A., Greaves, J., Fischer, R., Yinda, K.C., Ahmed, W., Kitajima, M., Munster, V.J.,  
522 Bibby, K., 2020. Persistence of SARS-CoV-2 in Water and Wastewater. *Environ Sci Technol*  
523 *Lett.*

524 Chan, K.H., Sridhar, S., Zhang, R.R., Chu, H., Fung, A.Y., Chan, G., Chan, J.F., To, K.K.,  
525 Hung, I.F., Cheng, V.C., Yuen, K.Y., 2020. Factors affecting stability and infectivity of  
526 SARS-CoV-2. *J Hosp Infect* 106, 226-231.

527 Chin, A.W.H., Chu, J.T.S., Perera, M.R.A., Hui, K.P.Y., Yen, H.L., Chan, M.C.W., Peiris,  
528 M., Poon, L.L.M., 2020. Stability of SARS-CoV-2 in different environmental conditions.  
529 *Lancet Microbe* 1, e10.

530 Cuevas-Ferrando, E., Giron-Guzman, I., Falco, I., Perez-Cataluna, A., Diaz-Reolid, A.,  
531 Aznar, R., Randazzo, W., Sanchez, G., 2022. Discrimination of non-infectious SARS-CoV-2  
532 particles from fomites by viability RT-qPCR. *Environ Res* 203, 111831.

533 de Oliveira, L.C., Torres-Franco, A.F., Lopes, B.C., Santos, B., Costa, E.A., Costa, M.S.,  
534 Reis, M.T.P., Melo, M.C., Polizzi, R.B., Teixeira, M.M., Mota, C.R., 2021. Viability of  
535 SARS-CoV-2 in river water and wastewater at different temperatures and solids content.  
536 *Water Res* 195, 117002.

537 De Rijcke, M., Shaikh, H.M., Mees, J., Nauwynck, H., Vandegheuchte, M.B., 2021.  
538 Environmental stability of porcine respiratory coronavirus in aquatic environments. *PLoS One*  
539 16, e0254540.

540 Desdouits, M., Piquet, J.C., Wacrenier, C., Le Mennec, C., Parnaudeau, S., Jousse, S., Rocq,  
541 S., Bigault, L., Contrant, M., Garry, P., Chavanon, F., Gabellec, R., Lamort, L., Lebrun, L.,  
542 Le Gall, P., Meteigner, C., Schmitt, A., Seugnet, J.L., Serais, O., Peltier, C., Bressollette-  
543 Bodin, C., Blanchard, Y., Le Guyader, F.S., 2021. Can shellfish be used to monitor SARS-  
544 CoV-2 in the coastal environment? *Sci Total Environ* 778, 146270.

545 Ding, S., Liang, T.J., 2020. Is SARS-CoV-2 Also an Enteric Pathogen With Potential Fecal-  
546 Oral Transmission? A COVID-19 Virological and Clinical Review. *Gastroenterology* 159,  
547 53-61.

548 Dona, D., Minotti, C., Costenaro, P., Da Dalt, L., Giaquinto, C., 2020. Fecal-Oral  
549 Transmission of SARS-CoV-2 In Children: is it Time to Change Our Approach? *Pediatr*  
550 *Infect Dis J* 39, e133-e134.

551 Giacobbo, A., Rodrigues, M.A.S., Zoppas Ferreira, J., Bernardes, A.M., de Pinho, M.N.,  
552 2021. A critical review on SARS-CoV-2 infectivity in water and wastewater. What do we  
553 know? *Sci Total Environ* 774, 145721.

554 Gu, J., Han, B., Wang, J., 2020. COVID-19: Gastrointestinal Manifestations and Potential  
555 Fecal-Oral Transmission. *Gastroenterology* 158, 1518-1519.

556 Guillier, L., Martin-Latil, S., Chaix, E., Thebault, A., Pavio, N., Le Poder, S., Batejat, C.,  
557 Biot, F., Koch, L., Schaffner, D.W., Sanaa, M., Covid-19 Emergency Collective Expert  
558 Appraisal, G., 2020. Modeling the Inactivation of Viruses from the Coronaviridae Family in  
559 Response to Temperature and Relative Humidity in Suspensions or on Surfaces. *Appl Environ*  
560 *Microbiol* 86.

561 Guo, W., Cao, Y., Kong, X., Kong, S., Xu, T., 2021. Potential threat of SARS-CoV-2 in  
562 coastal waters. *Ecotoxicol Environ Saf* 220, 112409.

563 Hale, V.L., Dennis, P.M., McBride, D.S., Nolting, J.M., Madden, C., Huey, D., Ehrlich, M.,  
564 Grieser, J., Winston, J., Lombardi, D., Gibson, S., Saif, L., Killian, M.L., Lantz, K., Tell, R.,  
565 Torchetti, M., Robbe-Austerman, S., Nelson, M.I., Faith, S.A., Bowman, A.S., 2021. SARS-  
566 CoV-2 infection in free-ranging white-tailed deer (*Odocoileus virginianus*). *bioRxiv*.



- 567 Han, J., He, S., 2021. Urban flooding events pose risks of virus spread during the novel  
568 coronavirus (COVID-19) pandemic. *Sci Total Environ* 755, 142491.
- 569 Heller, L., Mota, C.R., Greco, D.B., 2020. COVID-19 faecal-oral transmission: Are we asking  
570 the right questions? *Sci Total Environ* 729, 138919.
- 571 Hindson, J., 2020. COVID-19: faecal-oral transmission? *Nat Rev Gastroenterol Hepatol* 17,  
572 259.
- 573 Jones, D.L., Baluja, M.Q., Graham, D.W., Corbishley, A., McDonald, J.E., Malham, S.K.,  
574 Hillary, L.S., Connor, T.R., Gaze, W.H., Moura, I.B., Wilcox, M.H., Farkas, K., 2020.  
575 Shedding of SARS-CoV-2 in feces and urine and its potential role in person-to-person  
576 transmission and the environment-based spread of COVID-19. *Sci Total Environ* 749,  
577 141364.
- 578 Kampf, G., Todt, D., Pfaender, S., Steinmann, E., 2020. Persistence of coronaviruses on  
579 inanimate surfaces and their inactivation with biocidal agents. *J Hosp Infect* 104, 246-251.
- 580 Kwon, T., Gaudreault, N.N., Richt, J.A., 2021. Environmental Stability of SARS-CoV-2 on  
581 Different Types of Surfaces under Indoor and Seasonal Climate Conditions. *Pathogens* 10.
- 582 La Rosa, G., Bonadonna, L., Lucentini, L., Kenmoe, S., Suffredini, E., 2020a. Coronavirus in  
583 water environments: Occurrence, persistence and concentration methods - A scoping review.  
584 *Water Res* 179, 115899.
- 585 La Rosa, G., Iaconelli, M., Mancini, P., Bonanno Ferraro, G., Veneri, C., Bonadonna, L.,  
586 Lucentini, L., Suffredini, E., 2020b. First detection of SARS-CoV-2 in untreated wastewaters  
587 in Italy. *Sci Total Environ* 736, 139652.
- 588 Lanrewaju, A.A., Enitan-Folami, A.M., Sabiu, S., Edokpayi, J.N., Swalaha, F.M., 2022.  
589 Global public health implications of human exposure to viral contaminated water. *Front*  
590 *Microbiol* 13, 981896.
- 591 Le Guyader, F.S., Parnaudeau, S., Schaeffer, J., Bosch, A., Loisy, F., Pommepuy, M., Atmar,  
592 R.L., 2009. Detection and quantification of noroviruses in shellfish. *Appl Environ Microbiol*  
593 75, 618-624.
- 594 Lednicky, J.A., Tagliamonte, M.S., White, S.K., Elbadry, M.A., Alam, M.M., Stephenson,  
595 C.J., Bonny, T.S., Loeb, J.C., Telisma, T., Chavannes, S., Ostrov, D.A., Mavian, C., Beau De  
596 Rochars, V.M., Salemi, M., Morris, J.G., Jr., 2021. Independent infections of porcine  
597 deltacoronavirus among Haitian children. *Nature* 600, 133-137.
- 598 Lee, Y.J., Kim, J.H., Choi, B.S., Choi, J.H., Jeong, Y.I., 2020. Characterization of Severe  
599 Acute Respiratory Syndrome Coronavirus 2 Stability in Multiple Water Matrices. *J Korean*  
600 *Med Sci*.
- 601 Luan, J., Jin, X., Lu, Y., Zhang, L., 2020. SARS-CoV-2 spike protein favors ACE2 from  
602 Bovidae and Cricetidae. *J Med Virol* 92, 1649-1656.
- 603 Marques, M., Domingo, J.L., 2021. Contamination of inert surfaces by SARS-CoV-2:  
604 Persistence, stability and infectivity. A review. *Environ Res* 193, 110559.
- 605 Mathavarajah, S., Stoddart, A.K., Gagnon, G.A., Dellaire, G., 2021. Pandemic danger to the  
606 deep: The risk of marine mammals contracting SARS-CoV-2 from wastewater. *Sci Total*  
607 *Environ* 760, 143346.
- 608 McLeod, C., Polo, D., Le Saux, J.C., Le Guyader, F.S., 2017. Depuration and Relaying: A  
609 Review on Potential Removal of Norovirus from Oysters. *Compr Rev Food Sci Food Saf* 16,  
610 692-706.
- 611 Monteiro, S., Rente, D., Cunha, M.V., Marques, T.A., Cardoso, E., Vilaca, J., Coelho, N.,  
612 Broco, N., Carvalho, M., Santos, R., 2022. Discrimination and surveillance of infectious  
613 severe acute respiratory syndrome Coronavirus 2 in wastewater using cell culture and RT-  
614 qPCR. *Sci Total Environ* 815, 152914.
- 615 Mordecai, G.J., Hewson, I., 2020. Coronaviruses in the Sea. *Front Microbiol* 11, 1795.

- 616 Nabi, G., Khan, S., 2020. Risk of COVID-19 pneumonia in aquatic mammals. *Environ Res*  
617 188, 109732.
- 618 Nunez-Delgado, A., 2020. What do we know about the SARS-CoV-2 coronavirus in the  
619 environment? *Sci Total Environ* 727, 138647.
- 620 Patel, M., Chaubey, A.K., Pittman, C.U., Jr., Mlsna, T., Mohan, D., 2021. Coronavirus  
621 (SARS-CoV-2) in the environment: Occurrence, persistence, analysis in aquatic systems and  
622 possible management. *Sci Total Environ* 765, 142698.
- 623 Perez-Cataluna, A., Cuevas-Ferrando, E., Randazzo, W., Falco, I., Allende, A., Sanchez, G.,  
624 2021. Comparing analytical methods to detect SARS-CoV-2 in wastewater. *Sci Total Environ*  
625 758, 143870.
- 626 Polo, D., Quintela-Baluja, M., Corbishley, A., Jones, D.L., Singer, A.C., Graham, D.W.,  
627 Romalde, J.L., 2020. Making waves: Wastewater-based epidemiology for COVID-19 -  
628 approaches and challenges for surveillance and prediction. *Water Res* 186, 116404.
- 629 Prince, T., Smith, S.L., Radford, A.D., Solomon, T., Hughes, G.L., Patterson, E.I., 2021.  
630 SARS-CoV-2 Infections in Animals: Reservoirs for Reverse Zoonosis and Models for Study.  
631 *Viruses* 13.
- 632 Randazzo, W., Truchado, P., Cuevas-Ferrando, E., Simon, P., Allende, A., Sanchez, G., 2020.  
633 SARS-CoV-2 RNA in wastewater anticipated COVID-19 occurrence in a low prevalence  
634 area. *Water Res* 181, 115942.
- 635 Rimoldi, S.G., Stefani, F., Gigantiello, A., Polesello, S., Comandatore, F., Mileto, D.,  
636 Maresca, M., Longobardi, C., Mancon, A., Romeri, F., Pagani, C., Cappelli, F., Roscioli, C.,  
637 Moja, L., Gismondo, M.R., Salerno, F., 2020. Presence and infectivity of SARS-CoV-2 virus  
638 in wastewaters and rivers. *Sci Total Environ* 744, 140911.
- 639 Sala-Comorera, L., Reynolds, L.J., Martin, N.A., O'Sullivan, J.J., Meijer, W.G., Fletcher,  
640 N.F., 2021. Decay of infectious SARS-CoV-2 and surrogates in aquatic environments. *Water*  
641 *Res* 201, 117090.
- 642 Sharun, K., Dhama, K., Pawde, A.M., Gortazar, C., Tiwari, R., Bonilla-Aldana, D.K.,  
643 Rodriguez-Morales, A.J., de la Fuente, J., Michalak, I., Attia, Y.A., 2021. SARS-CoV-2 in  
644 animals: potential for unknown reservoir hosts and public health implications. *Vet Q* 41, 181-  
645 201.
- 646 Shutler, J.D., Zaraska, K., Holding, T., Machnik, M., Uppuluri, K., Ashton, I.G.C., Migdal,  
647 L., Dahiya, R.S., 2021. Rapid Assessment of SARS-CoV-2 Transmission Risk for Fecally  
648 Contaminated River Water. *ACS ES T Water* 1, 949-957.
- 649 Silverman, A.I., Boehm, A.B., 2021. Systematic Review and Meta-Analysis of the Persistence  
650 of Enveloped Viruses in Environmental Waters and Wastewater in the Absence of  
651 Disinfectants. *Environ Sci Technol* 55, 14480-14493.
- 652 Su, S., Wong, G., Shi, W., Liu, J., Lai, A.C.K., Zhou, J., Liu, W., Bi, Y., Gao, G.F., 2016.  
653 Epidemiology, Genetic Recombination, and Pathogenesis of Coronaviruses. *Trends Microbiol*  
654 24, 490-502.
- 655 Sun, Z.P., Yang, S.Y., Cai, X., Han, W.D., Hu, G.W., Qian, Y., Wang, Y.Y., Zhang, R., Xie,  
656 Y.H., Qu, D., 2022. Survival of SARS-CoV-2 in artificial seawater and on the surface of  
657 inanimate materials. *J Med Virol* 94, 3982-3987.
- 658 Tang, A., Tong, Z.D., Wang, H.L., Dai, Y.X., Li, K.F., Liu, J.N., Wu, W.J., Yuan, C., Yu,  
659 M.L., Li, P., Yan, J.B., 2020. Detection of Novel Coronavirus by RT-PCR in Stool Specimen  
660 from Asymptomatic Child, China. *Emerg Infect Dis* 26, 1337-1339.
- 661 Wu, Y., Guo, C., Tang, L., Hong, Z., Zhou, J., Dong, X., Yin, H., Xiao, Q., Tang, Y., Qu, X.,  
662 Kuang, L., Fang, X., Mishra, N., Lu, J., Shan, H., Jiang, G., Huang, X., 2020. Prolonged  
663 presence of SARS-CoV-2 viral RNA in faecal samples. *Lancet Gastroenterol Hepatol* 5, 434-  
664 435.



665 Wurtzer, S., Marechal, V., Mouchel, J.M., Maday, Y., Teyssou, R., Richard, E., Almayrac,  
666 J.L., Moulin, L., 2020. Evaluation of lockdown effect on SARS-CoV-2 dynamics through  
667 viral genome quantification in waste water, Greater Paris, France, 5 March to 23 April 2020.  
668 *Euro Surveill* 25.

669 Wyn-Jones, A.P., Carducci, A., Cook, N., D'Agostino, M., Divizia, M., Fleischer, J., Gantzer,  
670 C., Gawler, A., Girones, R., Holler, C., de Roda Husman, A.M., Kay, D., Kozyra, I., Lopez-  
671 Pila, J., Muscillo, M., Nascimento, M.S., Papageorgiou, G., Rutjes, S., Sellwood, J., Szewzyk,  
672 R., Wyer, M., 2011. Surveillance of adenoviruses and noroviruses in European recreational  
673 waters. *Water Res* 45, 1025-1038.

674 Xiao, F., Sun, J., Xu, Y., Li, F., Huang, X., Li, H., Zhao, J., Huang, J., Zhao, J., 2020.  
675 Infectious SARS-CoV-2 in Feces of Patient with Severe COVID-19. *Emerg Infect Dis* 26,  
676 1920-1922.

677 Ye, Y., Ellenberg, R.M., Graham, K.E., Wigginton, K.R., 2016. Survivability, Partitioning,  
678 and Recovery of Enveloped Viruses in Untreated Municipal Wastewater. *Environ Sci Technol*  
679 50, 5077-5085.

680 Zhang, H.H., Hu, W.Q., Li, J.Y., Liu, T.N., Zhou, J.Y., Opriessnig, T., Xiao, C.T., 2020a.  
681 Novel circovirus species identified in farmed pigs designated as Porcine circovirus 4, Hunan  
682 province, China. *Transbound Emerg Dis* 67, 1057-1061.

683 Zhang, Y., Chen, C., Zhu, S., Shu, C., Wang, D., Song, J., Song, Y., Zhen, W., Feng, Z., Wu,  
684 G., Xu, J., Xu, W., 2020b. Isolation of 2019-nCoV from a Stool Specimen of a Laboratory-  
685 Confirmed Case of the Coronavirus Disease 2019 (COVID-19). *China CDC Wkly* 2, 123-124.

686

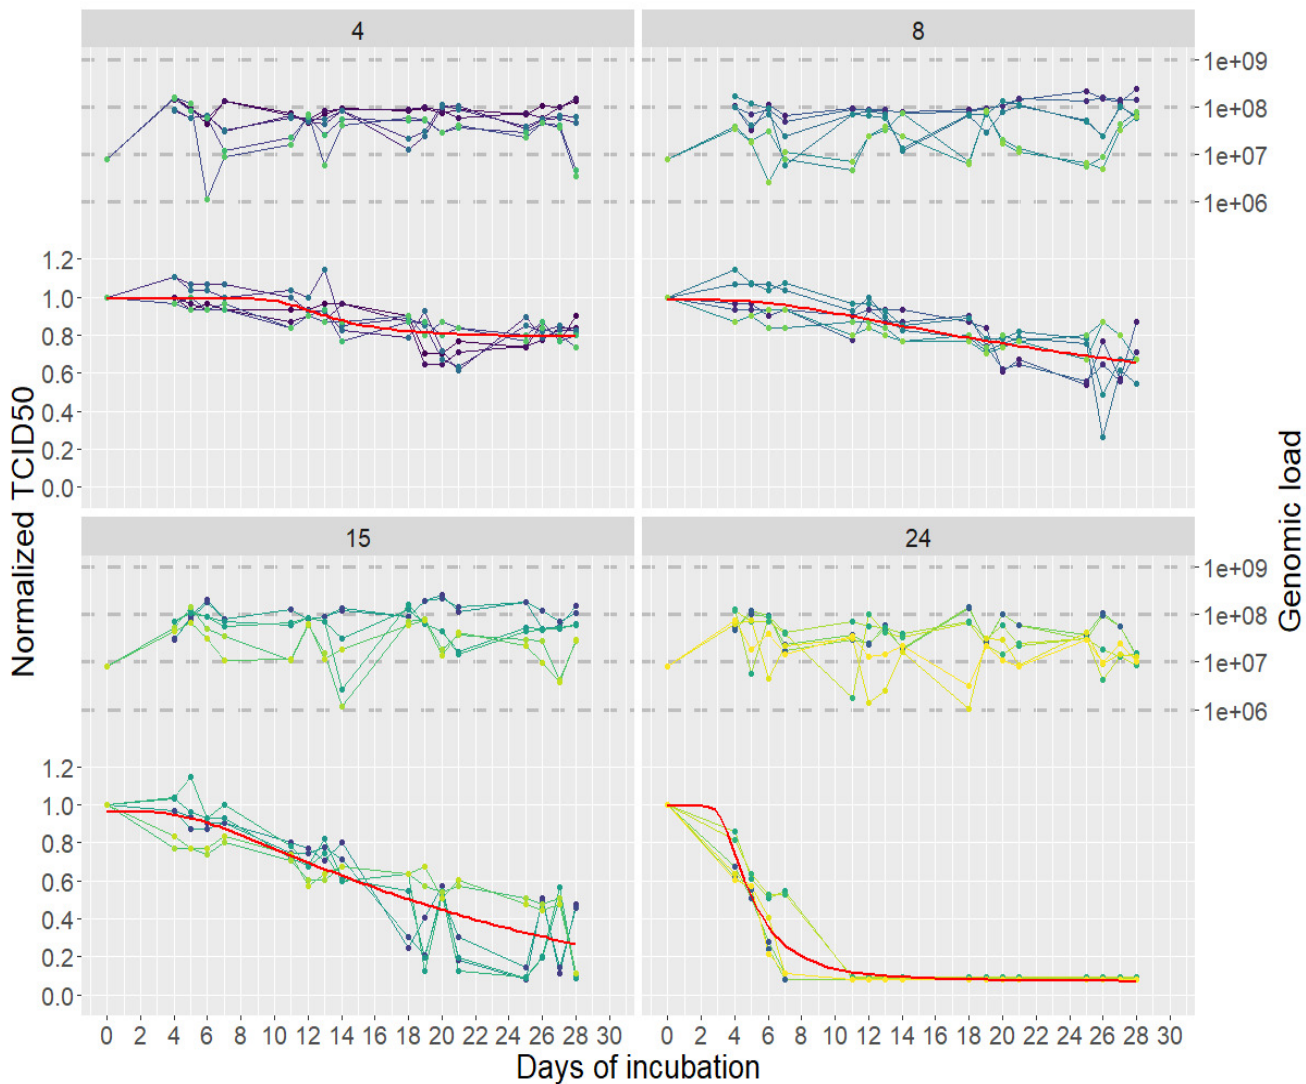

**Figure 1: Genomic and infectious titers of PEDv incubated in seawater at four different temperatures for 28 days.** 1 ml aliquots of seawater were spiked with the PEDv CV777 virus stock to achieve a load of  $1.10^6$  TCID<sub>50</sub> / ml and  $1.10^8$  genome copy / ml then incubated in water baths for 28 days at 4 different temperatures : 4°C, upper left panel ; 8°C, upper right panel ; 15°C, lower left panel and 24°C, lower right panel. The genomic load (genome copies, in log scale, right axis, upper part of each panel) and infectious titer (ratio of the TCID<sub>50</sub> measured at each time point (days of incubation, horizontal axis) on the one at day 0 for each experiment, left axis, bottom part of each panel) were measured 4 days a week (D4 to D7, D11 to D14, D18 to D21 and D25 to D28), by RT-qPCR and IPMA respectively, in duplicate for each aliquot on the same aliquot, and during three independent experiments. For each condition, the 6 measures are depicted with blue to yellow points and lines. The Weibull models calculated for the infectious titer decay are represented by the red curves.

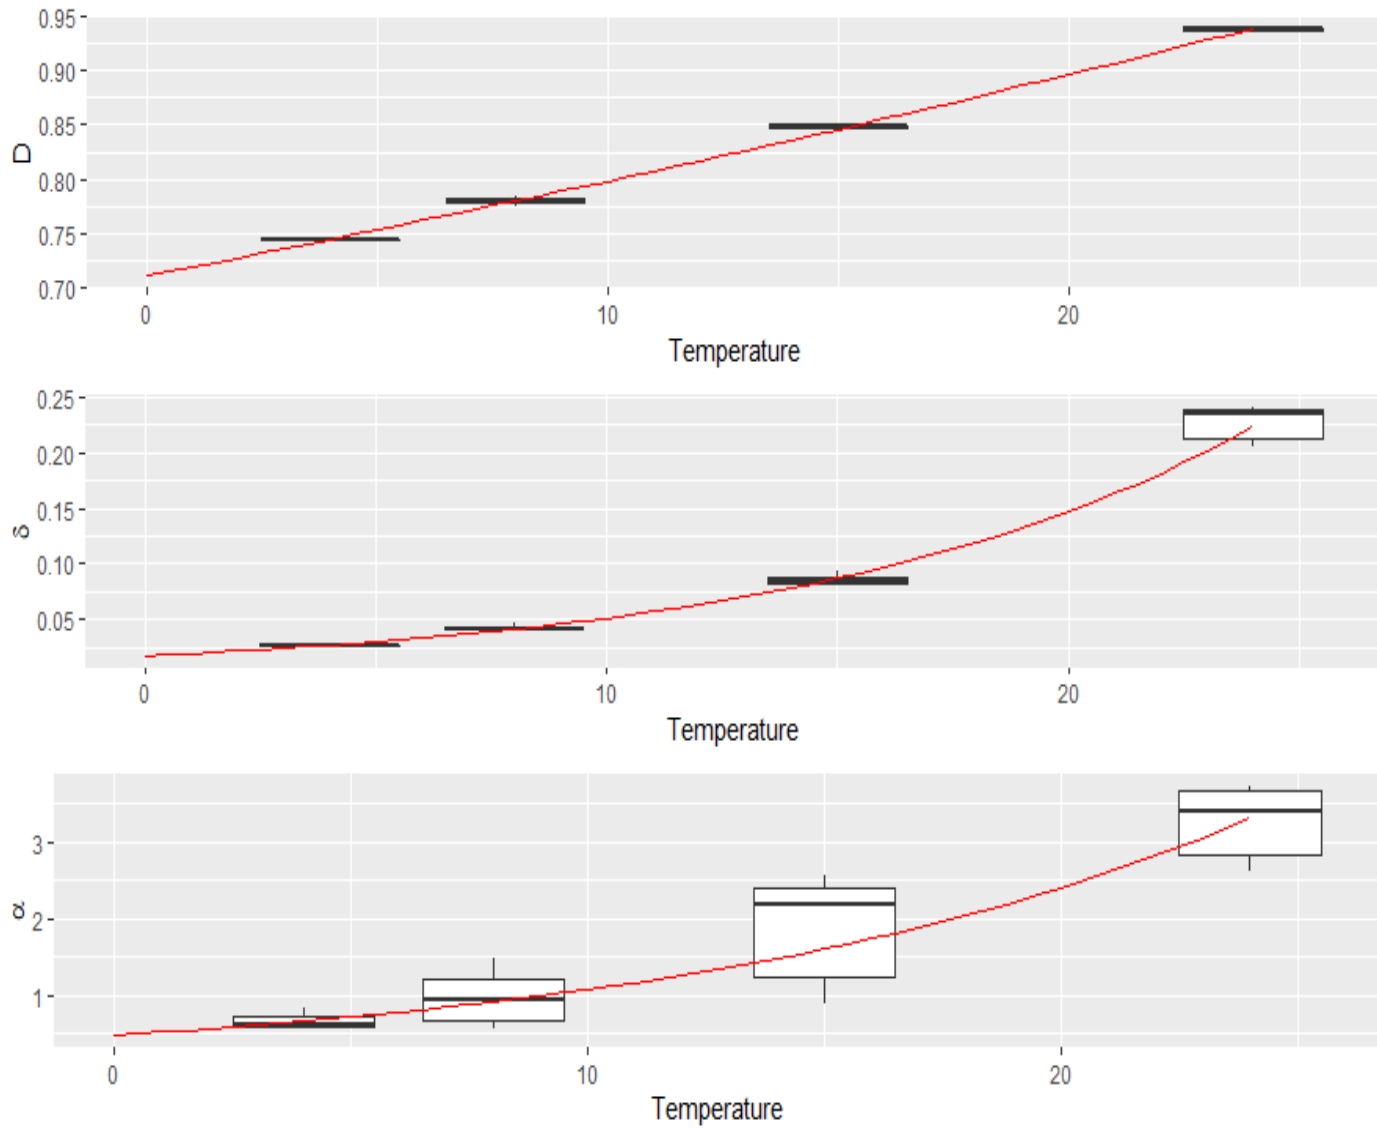

**Figure 2: Correlation between the parameters estimated for each kinetic and the water temperature.**

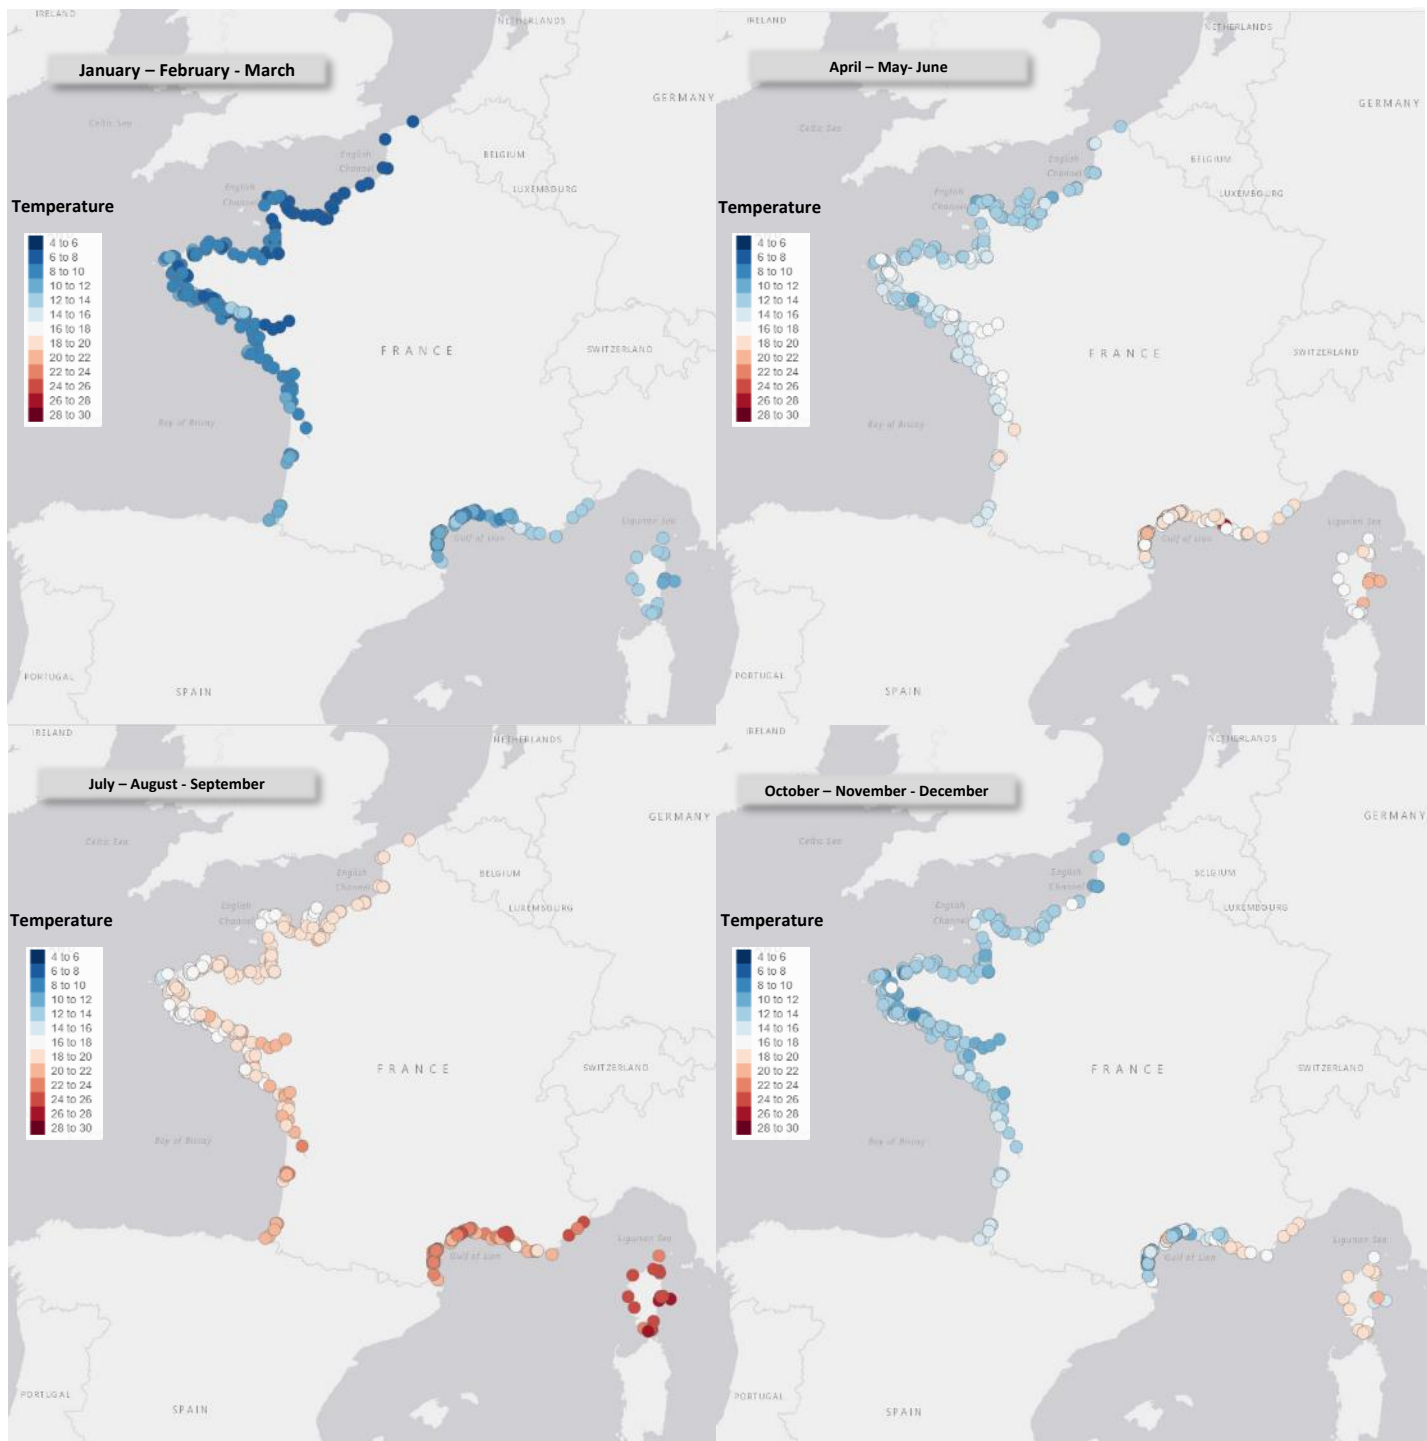

**Figure 3: Mean quarterly temperatures of surface waters on the French coast from 2000 to 2021.**

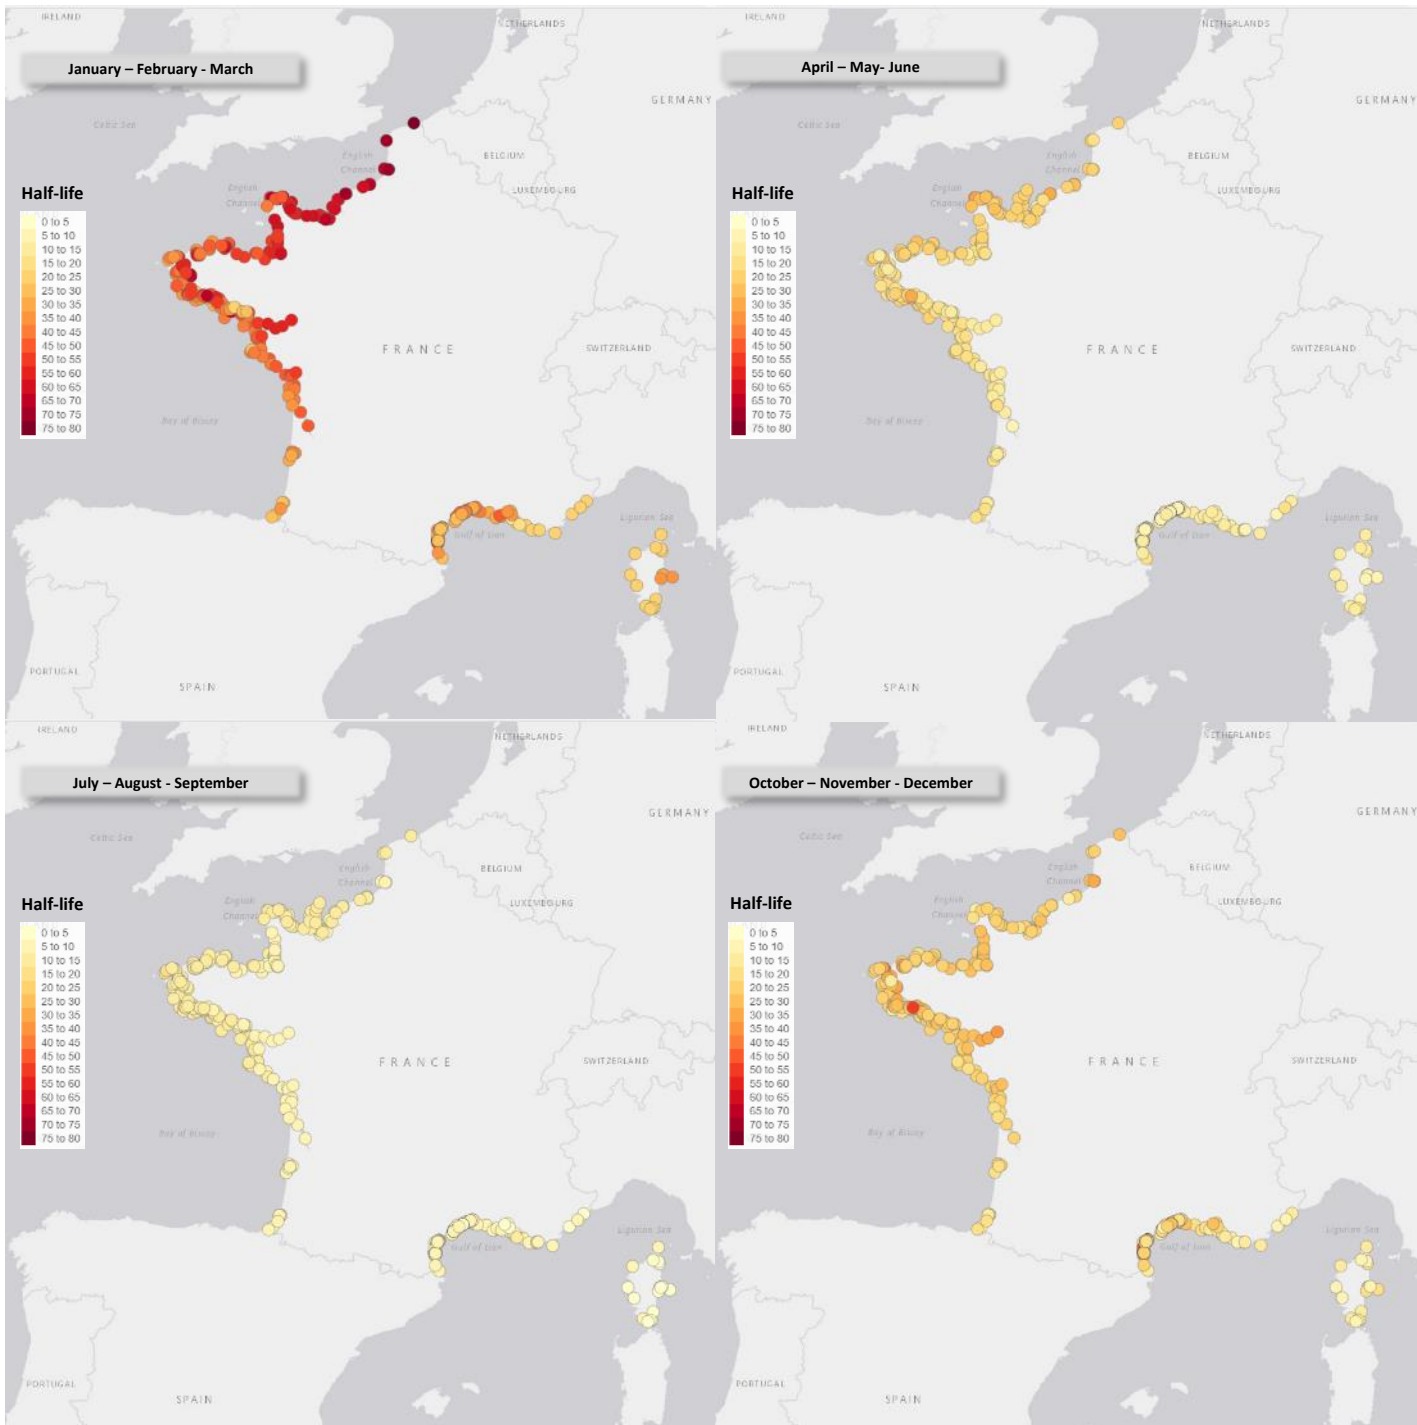

**Figure 4: Estimated half life (in days) of coronavirus in surface water, based on quarterly average temperature for each collection location.**

| Temp | Log10 TCID50 – Standard deviation |        |      |      |        |      |       |       |      |       |       |      |
|------|-----------------------------------|--------|------|------|--------|------|-------|-------|------|-------|-------|------|
|      | 4 °C                              |        |      | 8 °C |        |      | 15 °C |       |      | 24 °C |       |      |
| DPI  | mean                              | %      | SD   | mean | %      | SD   | mean  | %     | SD   | mean  | %     | SD   |
| 0    | 5.97                              | 100.00 | 0.30 | 5.97 | 100.00 | 0.30 | 5.99  | 100   | 0.28 | 5.94  | 100   | 0.33 |
| 4    | 6.10                              | 102.18 | 0.18 | 5.80 | 97.15  | 0.41 | 5.57  | 92.98 | 0.55 | 4.17  | 70.20 | 0.45 |
| 5    | 5.90                              | 98.83  | 0.22 | 5.80 | 97.15  | 0.24 | 5.40  | 90.15 | 0.62 | 3.43  | 57.74 | 0.16 |
| 6    | 5.83                              | 97.65  | 0.16 | 5.67 | 94.97  | 0.34 | 5.10  | 85.14 | 0.42 | 2.13  | 35.85 | 0.72 |
| 7    | 5.80                              | 97.15  | 0.21 | 5.70 | 95.48  | 0.31 | 5.33  | 88.98 | 0.29 | 1.43  | 24.07 | 1.22 |
| 11   | 5.47                              | 91.62  | 0.29 | 5.20 | 87.10  | 0.24 | 4.47  | 74.62 | 0.29 | 0.50  | 8.41  | 0.00 |
| 12   | 5.53                              | 92.63  | 0.15 | 5.50 | 92.13  | 0.31 | 4.03  | 67.27 | 0.53 | 0.50  | 8.41  | 0.00 |
| 13   | 5.67                              | 94.97  | 0.39 | 5.23 | 87.60  | 0.30 | 4.27  | 71.28 | 0.46 | 0.50  | 8.41  | 0.00 |
| 14   | 5.23                              | 87.60  | 0.64 | 5.00 | 83.75  | 0.47 | 4.07  | 67.94 | 0.60 | 0.50  | 8.41  | 0.00 |
| 18   | 5.20                              | 87.10  | 0.41 | 5.00 | 83.75  | 0.43 | 2.97  | 49.58 | 1.03 | 0.50  | 8.41  | 0.00 |
| 19   | 4.77                              | 79.90  | 0.50 | 4.50 | 75.38  | 0.36 | 2.20  | 36.72 | 1.39 | 0.50  | 8.41  | 0.00 |
| 20   | 4.40                              | 73.70  | 0.59 | 4.27 | 71.52  | 0.43 | 3.20  | 53.42 | 0.21 | 0.50  | 8.41  | 0.00 |
| 21   | 4.40                              | 73.70  | 0.73 | 4.43 | 74.20  | 0.27 | 2.00  | 33.38 | 1.30 | 0.50  | 8.41  | 0.00 |
| 25   | 4.77                              | 79.90  | 0.21 | 4.07 | 68.17  | 0.59 | 1.40  | 23.37 | 1.25 | 0.50  | 8.41  | 0.00 |
| 26   | 4.93                              | 82.58  | 0.37 | 3.93 | 65.83  | 1.54 | 2.33  | 38.89 | 0.97 | 0.50  | 8.41  | 0.00 |
| 27   | 4.83                              | 80.90  | 0.24 | 4.00 | 67.00  | 0.70 | 2.27  | 37.89 | 1.14 | 0.50  | 8.41  | 0.00 |
| 28   | 4.90                              | 82.08  | 0.42 | 4.13 | 69.18  | 1.37 | 1.19  | 22.87 | 0.50 | 0.00  | 0.00  | 0.00 |

**Table 1: log 10 TCID50 and % from TCID50 at D0 of PEDv for viral titer quantification results during incubation in seawater at 4°C, 8°C, 18°C and 24°C, per days, during 28 days.** 1 ml aliquots of water was spiked with the CV777 virus stock to achieve a load of 1.10e6 TCID50 / ml (6 log 10 TCID50) then incubated in water baths at the 4 different temperatures, for 28 days. Infectious titer were determined at day 0, 4 to 7, day 11 to 14 day 18 to 21 and day 25 to 28 by IPMA. **DPI: day post infection; SD: standard deviation; Temp: temperature.**

|                          | Bi-exponential model parameters |                  |              |              | Weibul model  |               |              |
|--------------------------|---------------------------------|------------------|--------------|--------------|---------------|---------------|--------------|
|                          | $a_1$                           | $\delta_1$       | $a_2$        | $\delta_2$   | $D$           | $\delta$      | $\alpha$     |
| Fixed effect             | 0.88 (0.11)                     | 0.003<br>(0.001) | 0.16 (0.02)  | 0.06 (0.08)  | 0.71 (0.09)   | 0.02 ( 0.002) | 0.48 (0.09)  |
| Temperature<br>Covariate | 0.006 (0.005)                   | 0.17* (0.02)     | -0.03 (0.05) | -0.03 (0.11) | 0.01* (0.005) | 0.1* (0.007)  | 0.08* (0.01) |
| AIC                      |                                 | -638             |              |              |               | -737          |              |

**Table 2: parameters estimated at the population level representing the average kinetics for the bi-exponential and the Weibull model. (\* p-value<0.05). AIC : Akaike’s information criterion.**
